# Supplementary material for: Epigenetic Biomarkers as Diagnostic Tools for Neurodegenerative Disorders
Source: MDPI journal article supplement (doi:10.3390/ijms23010013), 2021-12-21
Supplement: s1 [file s1]

## SUPPLEMENTARY

# EPIGENETIC BIOMARKERS AS DIAGNOSTIC TOOLS FOR NEURODEGENERATIVE DISORDERS

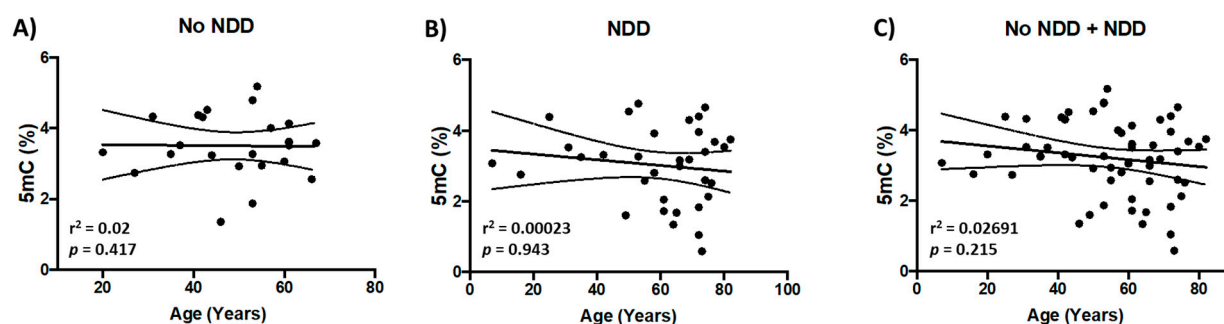

**Figure S1. Correlation analysis to test the association between 5mC levels and age in blood samples from patients with and without NDDs.** Global DNA methylation (5mC, %) levels were measured colorimetrically in buffy coat samples from (A) healthy individuals ( $n = 25$ ;  $p = 0.943$ ;  $r^2 = 0.00024$ ), (B) patients with NDDs ( $n = 35$ ;  $p = 0.417$ ;  $r^2 = 0.02$ ) and (C) no-NDD+NDD patients ( $n = 60$ ;  $p = 0.215$ ;  $r^2 = 0.02691$ ). Data points represent values of individual patients; unpaired  $t$  tests were used to determine significance between groups. Solid line, linear regression; stippled lines, 95% confidence interval bands. 5mC, 5-methylcytosine; NDD, patients with neurodegenerative diseases; no-NDD, individuals with no NDDs.

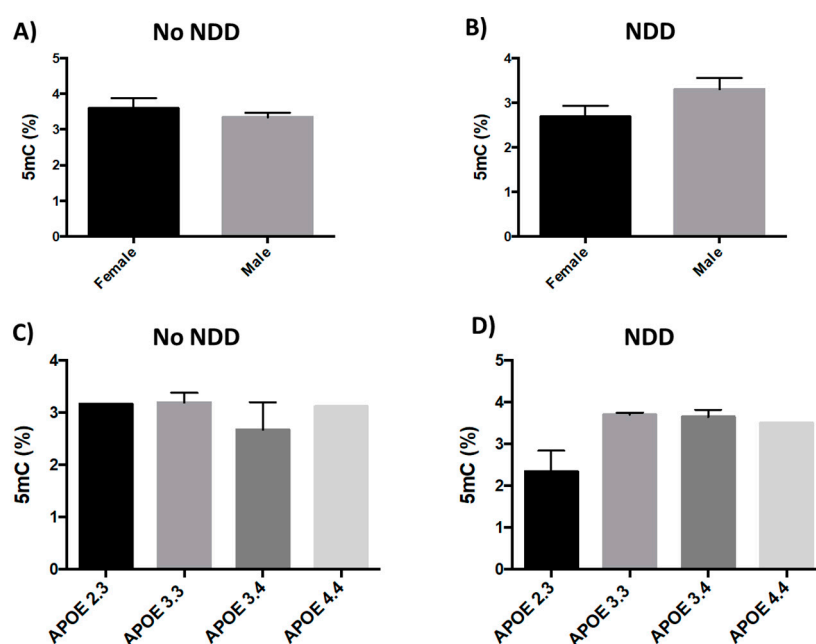

**Figure S2. Analysis of global DNA methylation across gender and APOE genophenotypes in blood samples from healthy subjects and patients with NDDs.** (A) Global DNA methylation (5mC, %) levels were measured colorimetrically using buffy coat samples from healthy (No-NDD) individuals ( $n = 10$  males;  $n = 15$  females), and (B) patients with NDDs ( $n = 18$  males;  $n = 16$  females). 5mC levels were determined for patients with the APOE 2.3, APOE 3.3, APOE 3.4 and APOE 4.4 genophenotypes in (C) healthy and (D) patients with NDDs. For APOE 2.3,  $n = 2$  no NDD,  $n = 1$  NDD; APOE 3.3,  $n = 4$  no NDD,  $n = 7$  NDD; APOE 3.4,  $n = 3$  no NDD,  $n = 6$  NDD; For APOE 4.4,  $n = 1$  no NDD,  $n = 1$  NDD. Data are presented as the mean  $\pm$  S.E.M; unpaired  $t$  tests. 5mC, 5-methylcytosine; APOE, apolipoprotein E; NDD, patients with neurodegenerative diseases; no-NDD, individuals with no NDDs.
